# Supplementary material for: Precision prediction of aquaculture water quality: a spatiotemporal model integrating optimized-LSTM and radial basis function neural networks
Source: PeerJ journal article supplement (doi:10.7717/peerj-cs.3515), 2026-01-27
Supplement: file1.xlsx [file file1.xlsx]

## Sheet: DO
No.	Actual	LSTM	LSTM+Self-Attention	Ours
1	4.72	4.05355	4.24859	4.74009
2	4.55	4.36334	4.27399	4.51276
3	5.42	4.76807	4.85013	5.31574
4	5.66	5.24958	5.14082	5.49606
5	5.3	5.18085	4.96544	5.1509
6	5.53	5.15784	5.03693	5.36787
7	5.72	5.34636	5.22846	5.54516
8	7.74	6.61024	6.69001	7.44469
9	6.8	6.97968	6.59797	6.60619
10	8.44	7.52936	7.545	8.16536
11	7.23	7.58716	7.11776	7.0367
12	6.79	6.76043	6.39773	6.544
13	6.2	6.21979	5.93103	6.00476
14	7.11	6.37976	6.40931	6.87131
15	6.78	6.64153	6.43568	6.57989
16	6.99	6.57835	6.46677	6.772
17	6.9	6.73021	6.41588	6.6684
18	6.77	6.6231	6.38105	6.56772
19	6.87	6.62646	6.39751	6.65728
20	7.95	7.31799	7.28658	7.73035
21	9.5	8.72753	8.6565	9.23954
22	8.78	9.18923	8.69505	8.66472
23	8.87	8.96457	8.49288	8.70586
24	8.71	8.91458	8.43738	8.56714
25	8.12	8.45157	7.96837	7.97185
26	7.95	8.03749	7.59132	7.7559
27	9.81	9.06603	8.97482	9.59651
28	12.67	11.5933	11.6821	12.4367
29	14.42	13.805	14.1091	14.5315
30	14.49	14.6751	14.5988	14.7791
31	12.39	13.9433	12.9554	12.6716
32	10.9	12.2918	11.3372	11.0347
33	12.16	12.0679	11.842	12.1976
34	12.4	12.6063	12.5507	12.6105
35	12.43	12.7669	12.4289	12.5543
36	11.37	12.302	11.8246	11.5998
37	11.04	11.6189	11.1263	11.0655
38	10.15	10.9377	10.3721	10.1663
39	9.3	10.0289	9.41126	9.24967
40	8.53	9.15509	8.58615	8.42571
41	7.91	8.36886	7.85604	7.78855
42	8.1	8.1706	7.8484	7.9615
43	7.6	7.94815	7.46706	7.44678
44	8.82	8.43215	8.26357	8.65093
45	8.76	8.94218	8.65869	8.65536
46	11.41	10.4107	10.4492	11.099
47	11.04	11.5432	11.2331	11.0993
48	10.01	10.7735	10.3439	10.062
49	10.91	10.8231	10.558	10.783
50	9.37	10.3529	9.81267	9.42949
51	11.27	10.6581	10.7226	11.1258
52	9.72	10.5365	10.3989	9.86672

## Sheet: pH
No.	Actual	LSTM	LSTM+Self-Attention	Ours
1	7.93	7.90552	7.89701	7.92285
2	7.95	7.91229	7.91826	7.94197
3	7.96	7.92164	7.9339	7.95375
4	8	7.93493	7.95039	7.99055
5	7.99	7.93064	7.95797	7.98318
6	7.99	7.93142	7.95587	7.98217
7	7.99	7.93369	7.95669	7.98226
8	8.08	7.98137	8.01597	8.07063
9	8.08	7.99256	8.03417	8.07099
10	8.14	8.0301	8.07772	8.13234
11	8.11	8.01812	8.06674	8.10146
12	8.08	7.98707	8.03818	8.07205
13	8.02	7.96278	8.01079	8.01378
14	8.03	7.97093	7.99194	8.02153
15	8.02	7.96866	7.99647	8.01143
16	8.04	7.97496	7.99768	8.03123
17	8.07	7.98697	8.02316	8.05928
18	8.04	7.9801	8.01735	8.0326
19	8.05	7.98275	8.01631	8.04021
20	8.08	8.01305	8.05001	8.07192
21	8.25	8.12544	8.15502	8.23856
22	8.22	8.12763	8.1837	8.21235
23	8.25	8.1366	8.20277	8.24219
24	8.27	8.16068	8.22584	8.26229
25	8.23	8.13277	8.20329	8.22428
26	8.25	8.13327	8.20536	8.24229
27	8.35	8.23949	8.29926	8.34664
28	8.65	8.56724	8.56068	8.65172
29	8.91	8.91712	8.88568	8.92718
30	9	9.06791	9.02313	9.01413
31	8.84	8.91622	8.90899	8.84865
32	8.56	8.58991	8.66094	8.5704
33	8.59	8.57523	8.60723	8.59795
34	8.61	8.65572	8.65429	8.62136
35	8.71	8.74745	8.70746	8.71583
36	8.59	8.65708	8.67455	8.60168
37	8.48	8.53771	8.54168	8.47859
38	8.38	8.40281	8.42332	8.375
39	8.31	8.30058	8.33466	8.30301
40	8.21	8.19912	8.24116	8.20198
41	8.2	8.16086	8.20504	8.18884
42	8.16	8.1424	8.17943	8.15117
43	8.15	8.12279	8.15132	8.13679
44	8.21	8.17134	8.20532	8.20023
45	8.19	8.19655	8.21705	8.17961
46	8.41	8.38069	8.35449	8.39821
47	8.34	8.39403	8.39019	8.33517
48	8.27	8.30902	8.31911	8.26384
49	8.34	8.351	8.33806	8.32913
50	8.3	8.31	8.33058	8.29392
51	8.38	8.38849	8.38547	8.37474
52	8.21	8.2956	8.30874	8.20957

## Sheet: Water temperature
No.	Actual	LSTM	LSTM+Self-Attention	Ours
1	17.8	17.5859	17.7085	17.7504
2	17.8	17.5784	17.7225	17.7562
3	17.8	17.5845	17.7212	17.7503
4	17.8	17.6026	17.78	17.7517
5	17.9	17.63	17.807	17.8569
6	17.9	17.6692	17.8431	17.8538
7	17.9	17.6719	17.8536	17.8554
8	18	17.7832	17.9979	17.9431
9	18.1	17.8611	18.1057	18.06
10	18.2	17.9837	18.2222	18.147
11	18.2	17.9861	18.247	18.1614
12	18.2	17.9587	18.2023	18.1593
13	18.3	18.0053	18.219	18.267
14	18.2	18.0262	18.2345	18.1598
15	18.2	17.9798	18.2061	18.1679
16	18.2	17.9972	18.2189	18.163
17	18.2	17.9974	18.2339	18.1619
18	18.2	17.9761	18.1936	18.1613
19	18.2	17.9877	18.2208	18.16
20	18.3	18.0709	18.3052	18.2571
21	18.5	18.3084	18.6103	18.4539
22	18.4	18.2392	18.5355	18.3562
23	18.5	18.2773	18.5825	18.4556
24	18.6	18.3836	18.6968	18.5548
25	18.7	18.4499	18.7547	18.659
26	18.9	18.6216	18.9459	18.8674
27	19.3	18.991	19.3264	19.2827
28	20	19.6848	20.0873	20.0257
29	21.2	20.699	21.1341	21.242
30	21.3	21.144	21.59	21.3472
31	20.2	20.357	20.8519	20.2122
32	19.5	19.4407	19.8644	19.4714
33	19.8	19.5015	19.9076	19.7957
34	20.3	19.9612	20.3687	20.3042
35	20.3	20.194	20.621	20.3268
36	20.3	20.0745	20.5137	20.3011
37	19.7	19.7204	20.1052	19.6932
38	19.3	19.252	19.6117	19.2753
39	19.1	18.9848	19.324	19.069
40	18.9	18.7559	19.0671	18.8619
41	19	18.7662	19.0915	18.9633
42	19	18.7992	19.0856	18.9613
43	18.9	18.7399	19.0469	18.8618
44	19.2	18.9058	19.2219	19.1637
45	19.2	19.0122	19.3299	19.1666
46	19.4	19.2455	19.5918	19.3737
47	19.2	19.0961	19.4234	19.1712
48	19.2	19.011	19.3425	19.1719
49	19.1	18.9992	19.3326	19.0647
50	19.3	19.0368	19.3995	19.269
51	19.5	19.2902	19.6304	19.4734
52	19.7	19.4111	19.7278	19.672

## Sheet: ORP
No.	Actual	LSTM	LSTM+Self-Attention	Ours
1	416	407.896	412.604	417.036
2	413	405.949	410.418	413.396
3	413	406.655	411.447	414.512
4	411	405.641	410.128	412.542
5	410	404.123	408.39	410.82
6	410	404.992	409.144	411.337
7	412	406.039	410.384	413.32
8	405	406.307	409.978	408.245
9	406	402.563	406.19	407.551
10	403	404.665	408.194	406.289
11	404	402.073	405.365	405.728
12	406	403.483	406.822	407.735
13	406	404.652	407.113	406.884
14	409	407.63	410.286	411.377
15	409	407.723	410.265	410.362
16	407	406.652	409.038	408.946
17	396	401.439	402.694	397.972
18	394	397.268	398.576	395.715
19	392	395.899	396.895	393.951
20	387	394.703	395.155	389.605
21	377	387.038	387.189	380.349
22	376	382.257	383.526	378.758
23	363	375.742	375.33	365.714
24	360	369.154	369.007	362.781
25	364	370.123	369.915	366.313
26	364	372.165	370.951	366.403
27	348	366.404	362.905	350.065
28	331	345.498	343.243	331.736
29	325	323.329	325.722	324.893
30	322	319.563	324.588	325.01
31	321	323.776	329.553	326.524
32	318	327.393	329.63	320.889
33	315	324.224	323.887	316.095
34	314	320.121	318.747	315.565
35	306	314.705	313.04	308.266
36	306	313.332	311.599	308.06
37	307	323.36	319.522	309.512
38	311	324.979	320.882	313.424
39	306	324.119	317.927	307.461
40	311	327.104	320.601	311.95
41	314	330.487	323.014	314.886
42	311	333.61	324.709	311.347
43	314	333.017	324.319	314.583
44	304	329.094	319.056	303.852
45	308	328.275	319.063	308.67
46	299	321.685	313.52	299.1
47	300	314.853	309.304	301.666
48	295	312.425	304.286	295.829
49	291	310.766	302.992	291.609
50	300	308.275	301.896	301.128
51	305	321.758	315.532	305.76
52	312	326.311	317.95	312.797

## Sheet: ammonia nitrogen
No.	Actual	LSTM	LSTM+Self-Attention	Ours
1	1.35	1.33017	1.33587	1.34771
2	1.35	1.33329	1.33681	1.34792
3	1.35	1.33631	1.34093	1.34794
4	1.36	1.34237	1.34838	1.35738
5	1.36	1.34277	1.34753	1.35739
6	1.36	1.34317	1.34915	1.35736
7	1.36	1.34301	1.34876	1.35738
8	1.37	1.35696	1.36773	1.36735
9	1.37	1.35674	1.36039	1.36735
10	1.38	1.36848	1.3795	1.37734
11	1.38	1.36526	1.37013	1.37704
12	1.38	1.36193	1.36991	1.37678
13	1.36	1.34972	1.35201	1.35759
14	1.37	1.35204	1.36003	1.36682
15	1.36	1.34796	1.35064	1.35743
16	1.37	1.35242	1.35889	1.36689
17	1.37	1.35754	1.36333	1.36725
18	1.37	1.35633	1.36131	1.36707
19	1.37	1.35649	1.3623	1.36715
20	1.37	1.36155	1.36793	1.36754
21	1.4	1.38683	1.40068	1.39721
22	1.4	1.39045	1.39798	1.3973
23	1.4	1.39423	1.40359	1.39754
24	1.4	1.39563	1.40345	1.39769
25	1.4	1.39143	1.39854	1.39725
26	1.4	1.39133	1.40035	1.39746
27	1.42	1.41107	1.42719	1.41793
28	1.47	1.45511	1.48227	1.46909
29	1.51	1.49143	1.52039	1.5109
30	1.53	1.51252	1.53936	1.53101
31	1.5	1.49993	1.51538	1.50122
32	1.46	1.46503	1.47471	1.45988
33	1.46	1.45658	1.47426	1.45994
34	1.46	1.4559	1.46921	1.46076
35	1.48	1.47085	1.48861	1.48
36	1.46	1.45907	1.4686	1.46074
37	1.44	1.44439	1.45233	1.44044
38	1.42	1.42477	1.42802	1.41956
39	1.41	1.41281	1.41518	1.40862
40	1.4	1.39849	1.40028	1.39794
41	1.39	1.38928	1.39068	1.38816
42	1.39	1.38763	1.39028	1.38782
43	1.39	1.38397	1.38649	1.38741
44	1.4	1.39419	1.40158	1.3978
45	1.39	1.39049	1.39145	1.38871
46	1.43	1.42184	1.43699	1.4285
47	1.42	1.4212	1.42451	1.41937
48	1.41	1.40953	1.41007	1.40874
49	1.42	1.41762	1.42542	1.41876
50	1.41	1.40773	1.40775	1.40868
51	1.42	1.41927	1.42912	1.41974
52	1.4	1.39893	1.39497	1.39886
